# Supplementary material for: A Recombinant Multivalent Vaccine (rCpa1) Induces Protection for C57BL/6 and HLA Transgenic Mice against Pulmonary Infection with Both Species of Coccidioides
Source: MDPI journal article supplement (doi:10.3390/vaccines12010067), 2024-01-09
Supplement: s1 [file s1]

Supplemental Figure S1. Alignment of rCpa1 and rCpa2

rCpa1 accession no. KY883768, 586 AA

rCpa2 accession no. WAB54687.1, 586 AA

CLUSTAL O(1.2.4) multiple sequence alignment

|       |                                                                     |     |
|-------|---------------------------------------------------------------------|-----|
| rCpa1 | MGSSHHHHHHSSGLVPRGSHMGPGPMQFSHALIALVAAGLASAQLPDI PPCALNCFVEA        | 60  |
| rCpa2 | MGSSHHHHHHSSGLVPRGSHMGPGPMQFSHALIALVAAGLASAQLPDI PPCALNCFVEA        | 60  |
|       | *****                                                               |     |
| rCpa1 | LGNDGCTRLTDFKCHCSKPELPGQI TPCVEEACPLDARISVSNI VVDQCSKAGVPI DIPP     | 120 |
| rCpa2 | LGNDGCTRLTDFKCHCSKPELPGQI TPCVEEACPLDARISVSNI VVDQCSKAGVPI EIPP     | 120 |
|       | *****:                                                              |     |
| rCpa1 | VDTTAAPEPSETGPGPGMKFSLLSAIAAAVFVPFTSATPLASTADLSYDTHYDDPSLPLS        | 180 |
| rCpa2 | VDTTAAPEPSETGPGPGMKFSLLSAIAAAVFVPFTSATPLASTTDLSDYDTHYDDPSLALS       | 180 |
|       | *****:*****                                                         |     |
| rCpa1 | GVTCSDGDNGMITKGYNTAGEIPNYPHVGGAFVETWNSPNCGKCYKVTYNAKTI FLTAI        | 240 |
| rCpa2 | GVTCSDGDNGMITKGYNTAGEIPNYPHVGGAFVETWNSPNCGKCYKVTYNAKTI FLTAI        | 240 |
|       | *****                                                               |     |
| rCpa1 | DHSNSGFNI AKKSMDVLTNGRAEELGRI KVTYEEVASSLCGLKGPGPGMASLKAGDSFPS      | 300 |
| rCpa2 | DHSNSGFNI AKKSMDVLTNGRAEELGRI KVTYEEVASSLCGLKGPGPGMASLKAGDSFPS      | 300 |
|       | *****                                                               |     |
| rCpa1 | DVVFSYIPWTPDNKDI KACGMPQNYEASKLWADKKVVL FSLPGAFTPTCSASHLPGYIQK      | 360 |
| rCpa2 | DVVFSYIPWTPDNKDI KACGMPQNYEASKLWADKKVVL FSLPGAFTPTCSASHLPGYIQK      | 360 |
|       | *****                                                               |     |
| rCpa1 | LPQLKEKGV DVVAVLAFNDAWMSAWGKANGVTGDDILFLSDPEAKFSKSI GWNAGERTG       | 420 |
| rCpa2 | LPQLKEKGV DVVAVLAFNDAWMSAWGKANGVTGDDILFLSDPEAKFSKSI GWNAGERTG       | 420 |
|       | *****                                                               |     |
| rCpa1 | RYAMII DHGQV TYAEI EPGREVT VSGADAVI SKLGPGPGMRNSI LLAATVLLGCTSAKVH  | 480 |
| rCpa2 | RYAII I DHGK VTYAEI EPGREVT VSGADAVF SKLGPGPGMRNSI LLAATVLLGCTSAKVH | 480 |
|       | ***:*****:*****:*****                                               |     |
| rCpa1 | GPGPGHVRALGQKYFGSLPSSQQQT VGP GPGPAKVDVLLAQSLKLADV LKFGPGPGNGLA     | 540 |
| rCpa2 | GPGPGHVRALGQKYFGSLPSSQQQT VGP GPGPAKVDVLLAQSLKLADV LKFGPGPGNGLA     | 540 |
|       | *****                                                               |     |
| rCpa1 | TTGTLVLEWTRLSDITGPGPGT PLVVI IPNYPYTT WSNISTGPGPG                   | 586 |
| rCpa2 | TTGTLVLEWTRLSDITGPGPGT PLVVI IPNYPYTT FSNISTGPGPG                   | 586 |
|       | *****:*****                                                         |     |

**Supplementary Table S1.** Primer sequences and predicted sizes of PCR amplicons of the *Coccidioides* antigens

| Antigen<br>GenBank No.    | Primer Sequences*                                                                             | PCR<br>amplicon<br>size (bp) | Reference                                                                                     |
|---------------------------|-----------------------------------------------------------------------------------------------|------------------------------|-----------------------------------------------------------------------------------------------|
| Ag2/Pra<br>(XM_003069107) | Forward:<br>5' -AATCGTTCTCGTCCGTTAGA-3'<br><br>Reverse:<br>5' -CTCCTCGGTTGGCTCAG-3'           | 585                          | Jiang et al,<br>1999<br>Peng et al,<br>1999<br>Kirkland et al,<br>1998<br>Herr et al,<br>2007 |
| Cs-Ag<br>(XM_003065932)   | Forward:<br>5' -GGGAAAGATGAAGTTCTCACTCCT-3'<br><br>Reverse:<br>5' -GCACATCGCCCAATACGCCTTTA-3' | 443                          | Pan et al, 1995<br>Shubitz et al,<br>2006                                                     |
| Pmp1<br>(XM_003069228)    | Forward:<br>5' -GTCTGCCAACGCTCGATTAC-3'<br><br>Reverse:<br>5' -GGCCGTTTCCCTTGATTCTCC-3'       | 501                          | Orsborn et al,<br>2006                                                                        |
| Amn1<br>(XM_003068811)    | Forward:<br>5' -TGAAACCACCATTCGCTACCT-3'<br><br>Reverse:<br>5' -AGGCCCGTCTCAATGTCAAT-3'       | 331                          | Tarcha et al,<br>2006<br>Hurtgen et al,<br>2012                                               |
| Plb<br>(XM_003065040)     | Forward:<br>5' -CTTTGCCATCGACTCTTCTG-3'<br><br>Reverse:<br>5' -CAAACGACCGACTCAAGATAG-3'       | 677                          | Hurtgen et al,<br>2017                                                                        |
| Pep1<br>(XM_001244245.2)  | Forward:<br>5' -CACACGCTCTTTCAAGACC-3'<br><br>Reverse:<br>5' -CAGAGATTTGAGCTTCCTGTG-3'        | 537                          |                                                                                               |

\*Gene-specific primers only flank DNA fragments of each antigenic peptides that were incorporated in the chimeric rCpa1 vaccine antigen (GenBank accession AVH85517.1).
